# Supplementary material
Source: publisher figshare collection journal article supplement (https://karger.figshare.com/ndownloader/files/25520762)
Supplement: Supplementary file 1 [file 25520762]

**Suppl. Fig. 1.** Forest plot of the random-effects meta-analysis of the effect of green tea on waist circumference.

**Suppl. Fig. 2.** Forest plot of the fixed-effects meta-analysis of the effect of green tea on body fat.
